# Supplementary material for: Effect of benzoic acid surface modified alumina nanoparticles on the mechanical properties and crystallization behavior of isotactic polypropylene nanocomposites
Source: Royal Society of Chemistry journal article supplement (doi:10.1039/c8ra01069b), 2018-01-01
Supplement: c8ra01069b1.pdf [file c8ra01069b1.pdf]

## Supporting Information

### **The Effect of Benzoic Acid Surface Modified Alumina Nanoparticles on the Crystallization Behavior and Mechanical Properties of Isotactic Polypropylene Nanocomposites**

**Xiaofeng Jiang,<sup>a</sup> Wenxue Zhang,<sup>b</sup> Shicheng Zhao,<sup>a</sup> Shuai Zhou,<sup>a</sup> YaoQi Shi<sup>a</sup> and Zhong Xin<sup>\*a</sup>**

<sup>a</sup>Shanghai Key Laboratory of Multiphase Materials Chemical Engineering, State-Key Laboratory of Chemical Engineering, East China University of Science and Technology, Shanghai, 200237, China. E-mail: [xzh@ecust.edu.cn](mailto:xzh@ecust.edu.cn)

<sup>b</sup>Lanzhou Petrochemical Research Center, PetroChina, 730060, China

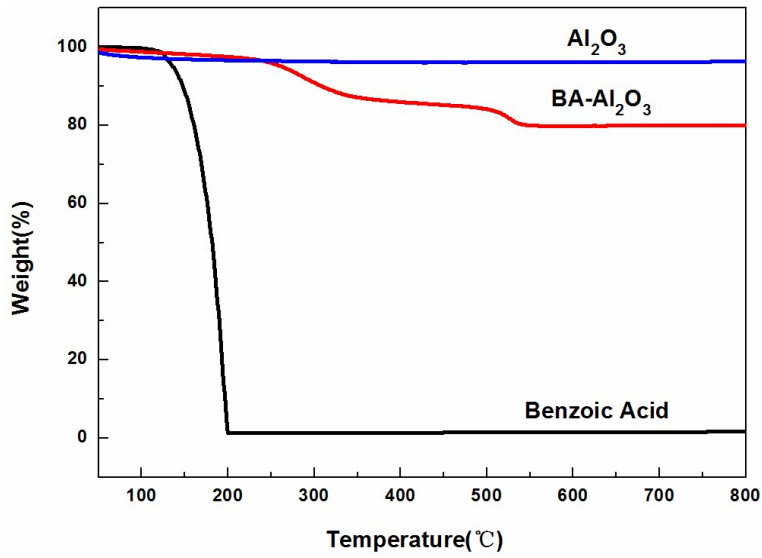

**Fig. S1** TGA of pristine alumina NPs, functionalized alumina NPs and native carboxylic acids

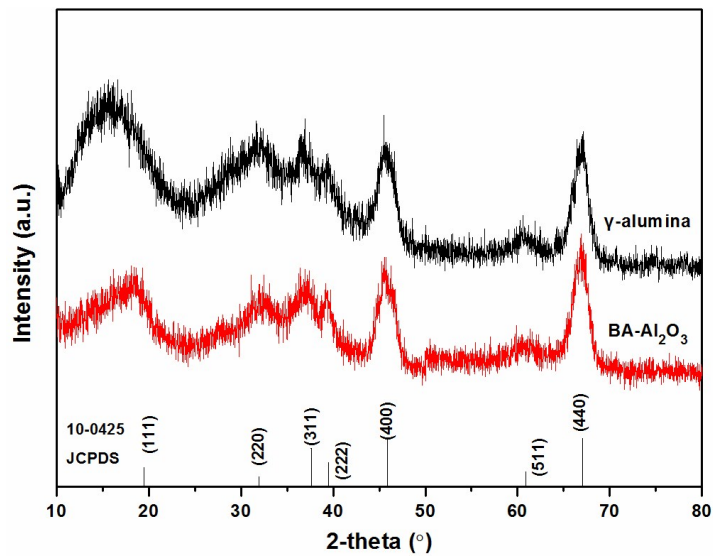

**Fig. S2** WAXD patterns of pristine alumina NPs and functionalized alumina NPs

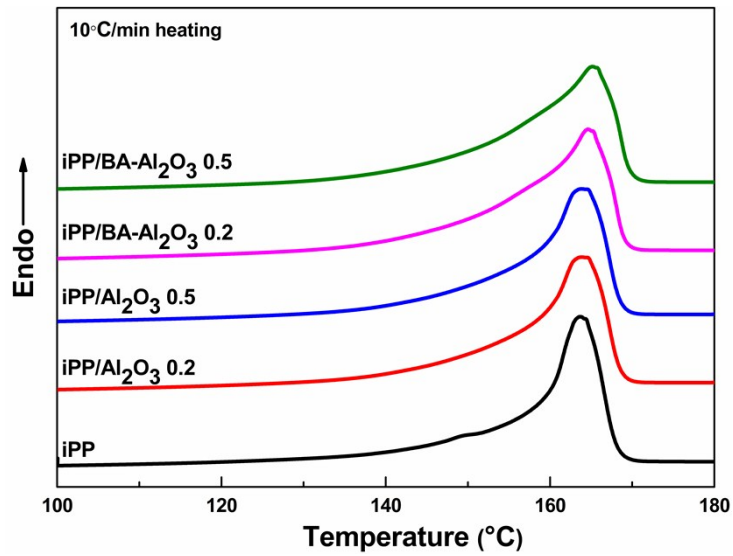

**Fig. S3** The DSC heat flow curves during heating at a rate of 10 °C/min for neat iPP, iPP/Al<sub>2</sub>O<sub>3</sub> and iPP/BA-Al<sub>2</sub>O<sub>3</sub> nanocomposites at a 0.2wt% and 0.5wt% NPs loading

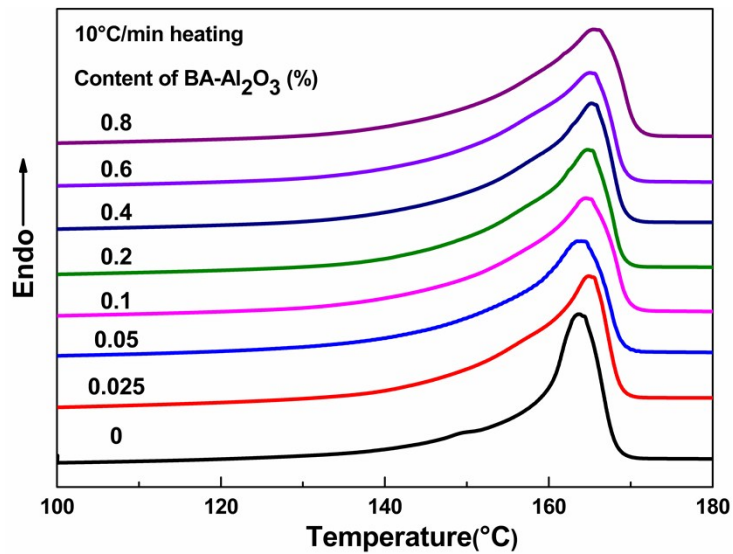

**Fig. S4** The DSC heat flow curves during heating at a rate of 10 °C/min for iPP/BA-Al<sub>2</sub>O<sub>3</sub> nanocomposites at different loading

**Table S1** Mechanical Properties of the Prepared Nanocomposites

| BA-Al <sub>2</sub> O <sub>3</sub> , wt % | elastic modulus, MPa | stress at yield, MPa | tensile strength, MPa | flexural modulus, MPa | impact strength, J/m |
|------------------------------------------|----------------------|----------------------|-----------------------|-----------------------|----------------------|
| 0                                        | 290 ± 9              | 1369 ± 18            | 31.5 ± 0.4            | 1129 ± 12             | 42.6 ± 0.8           |
| 0.025                                    | 320 ± 19             | 1526 ± 11            | 35.1 ± 0.2            | 1345 ± 58             | 50.2 ± 2.6           |
| 0.05                                     | 309 ± 12             | 1539 ± 3             | 35.4 ± 0.1            | 1395 ± 25             | 51.4 ± 1.4           |
| 0.1                                      | 339 ± 13             | 1550 ± 5             | 35.7 ± 0.1            | 1379 ± 17             | 51.6 ± 1.8           |
| 0.2                                      | 346 ± 61             | 1535 ± 6             | 35.3 ± 0.1            | 1434 ± 12             | 48.8 ± 1.6           |
| 0.4                                      | 337 ± 16             | 1545 ± 7             | 36.3 ± 0.2            | 1420 ± 11             | 46.4 ± 3.5           |
| 0.6                                      | 350 ± 61             | 1539 ± 10            | 36.2 ± 0.2            | 1491 ± 11             | 50.9 ± 2.4           |
| 0.8                                      | 331 ± 30             | 1558 ± 8             | 36.6 ± 0.2            | 1490 ± 13             | 45.2 ± 0.9           |
